# Supplementary material
Source: MDPI journal article supplement (https://www.mdpi.com/2304-6740/11/10/387)
Supplement: s1 [file s1]

# Supplementary Materials

## for

### Luminescent diimine-Pt(IV) complexes with axial phenyl selenide ligands

Marzieh Dadkhah Aseman<sup>a\*</sup>, Reza Babadi Aghakhanpour<sup>a</sup>, Zohreh Sharifioliaei<sup>b</sup>, Axel Klein<sup>c\*</sup>  
and S. Masoud Nabavizadeh<sup>d</sup>

<sup>a</sup> Department of Chemistry, Faculty of Sciences, Tarbiat Modares University, Tehran, 15719-14911, Iran, Email: m.dadkhah@modares.ac.ir

<sup>b</sup> Faculty of Chemistry, Kharazmi University, Tehran 15719-14911, Iran.

<sup>c</sup> University of Cologne, Faculty of Mathematics and Natural Sciences, Department of Chemistry, Institute for Inorganic Chemistry, Greinstrasse 6, D-50939 Köln, Germany, Email: axel.klein@uni-koeln.de

<sup>d</sup> Professor Rashidi Laboratory of Organometallic Chemistry, Department of Chemistry, College of Sciences, Shiraz University, Shiraz 71467-13565, Iran

---

#### Contents

**Figure S1.** <sup>1</sup>H NMR spectrum of **1b** in CDCl<sub>3</sub>.

**Figure S2.** <sup>1</sup>H NMR spectrum of **2b** in CDCl<sub>3</sub>.

**Figure S3.** <sup>1</sup>H NMR spectrum of **3b** in CDCl<sub>3</sub>.

**Figure S4.** <sup>13</sup>C{H} NMR spectrum of **3b** in CDCl<sub>3</sub>.

**Figure S5.** <sup>77</sup>Se{H} NMR spectrum of **3b** in CDCl<sub>3</sub>.

**Figure S6.** View of the DFT-optimised S<sub>0</sub> structure of **1b** in the gas phase with atom numbering.

**Table S1.** Selected DFT-calculated metrics for the S<sub>0</sub> state of **1b** in the gas phase and CH<sub>2</sub>Cl<sub>2</sub> compared with experimental data from single crystal XRD.

**Table S2.** Selected DFT-calculated metrics for the T<sub>1</sub> state of the complexes **1b** and **2b** in the gas phase.

**Figure S7.** View of the DFT-optimised S<sub>0</sub> structure of **2b** in the gas phase with atom numbering.

**Table S3.** Selected DFT-calculated metrics for the S<sub>0</sub> state of **2b** in the gas phase and CH<sub>2</sub>Cl<sub>2</sub> compared with experimental data from single crystal XRD.

**Figure S8.** View of the DFT-optimised S<sub>0</sub> structure of **3b** in the gas phase with atom numbering.

**Table S4.** Selected DFT-calculated metrics for the S<sub>0</sub> state of **3b** in gas phase and CH<sub>2</sub>Cl<sub>2</sub>.<sup>a</sup>

**Figure S9.** UV-vis absorption spectra of **1b**, **2b**, **3b** (all 10<sup>-5</sup> M) in CH<sub>2</sub>Cl<sub>2</sub> at 298 K.

**Figure S10.** UV-vis absorption spectra of the complex **3b** in *tris*-HCl buffer at 298 K (1.1×10<sup>-5</sup> M). blue line, *t* = 0, red line, *t* = 30 min.

**Figure S11.** Molecular orbital plots for the DFT-optimised S<sub>0</sub> structure of **1b** in CH<sub>2</sub>Cl<sub>2</sub> solution.

**Figure S12.** Molecular orbital plots for the DFT-optimised S<sub>0</sub> structure of **2b** in CH<sub>2</sub>Cl<sub>2</sub> solution.

**Figure S13.** Molecular orbital plots for the DFT-optimised S<sub>0</sub> structure of **3b** in CH<sub>2</sub>Cl<sub>2</sub> solution.

**Table S5.** Composition and energies of selected molecular orbitals of **1b** in CH<sub>2</sub>Cl<sub>2</sub>.

**Table S6.** Composition and energies of selected molecular orbitals of **2b** in CH<sub>2</sub>Cl<sub>2</sub>.

**Table S7.** Composition and energies of selected molecular orbitals of **3b** in CH<sub>2</sub>Cl<sub>2</sub>.

**Table S8.** Wavelengths and the nature of transitions for the complex **1b**.

**Table S9.** Wavelengths and the nature of transitions for the complex **2b**.

**Table S10.** Wavelengths and the nature of transitions for the complex **3b**.

#### References

---

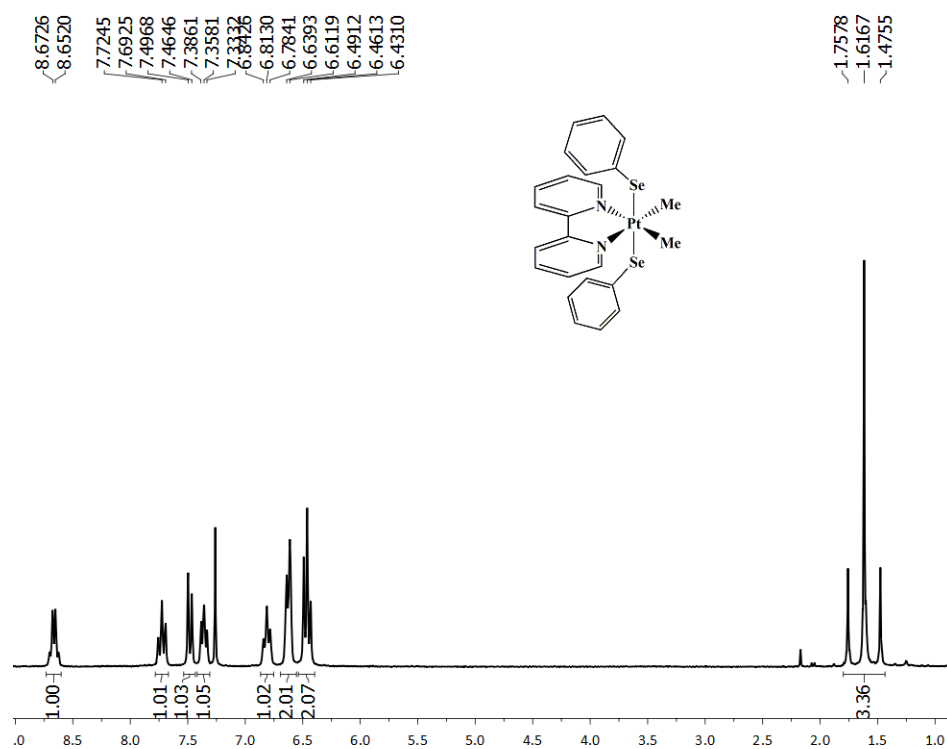

**Figure S1.** <sup>1</sup>H NMR spectrum of **1b** in CDCl<sub>3</sub>.

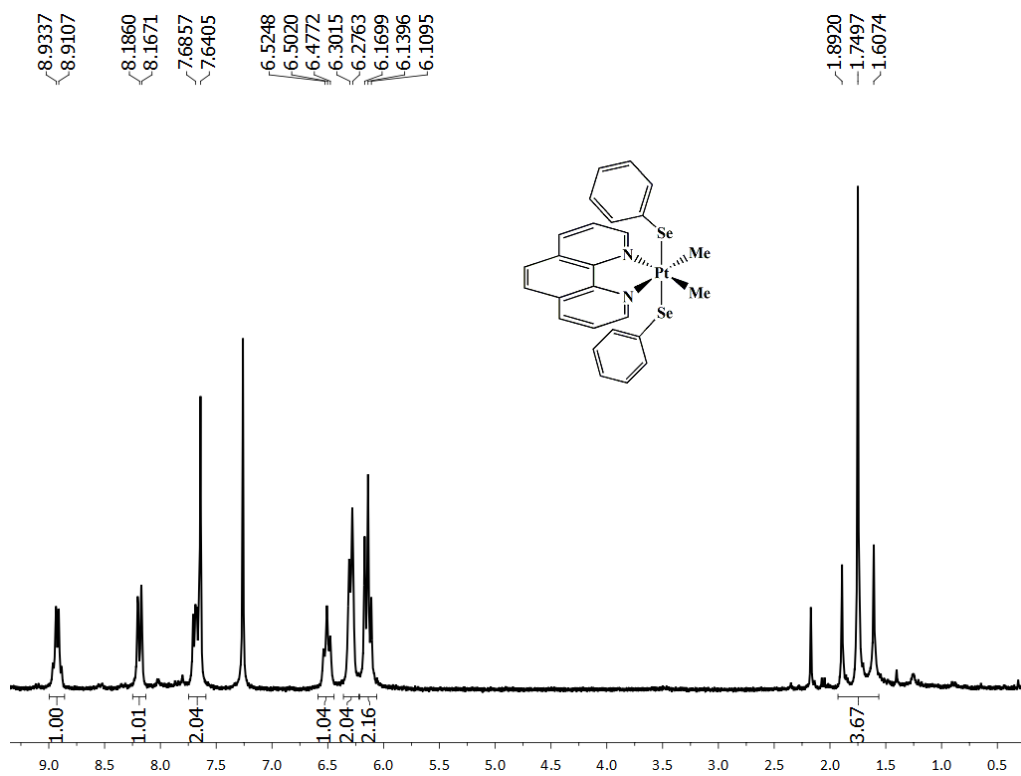

**Figure S2.** <sup>1</sup>H NMR spectrum of **2b** in CDCl<sub>3</sub>.

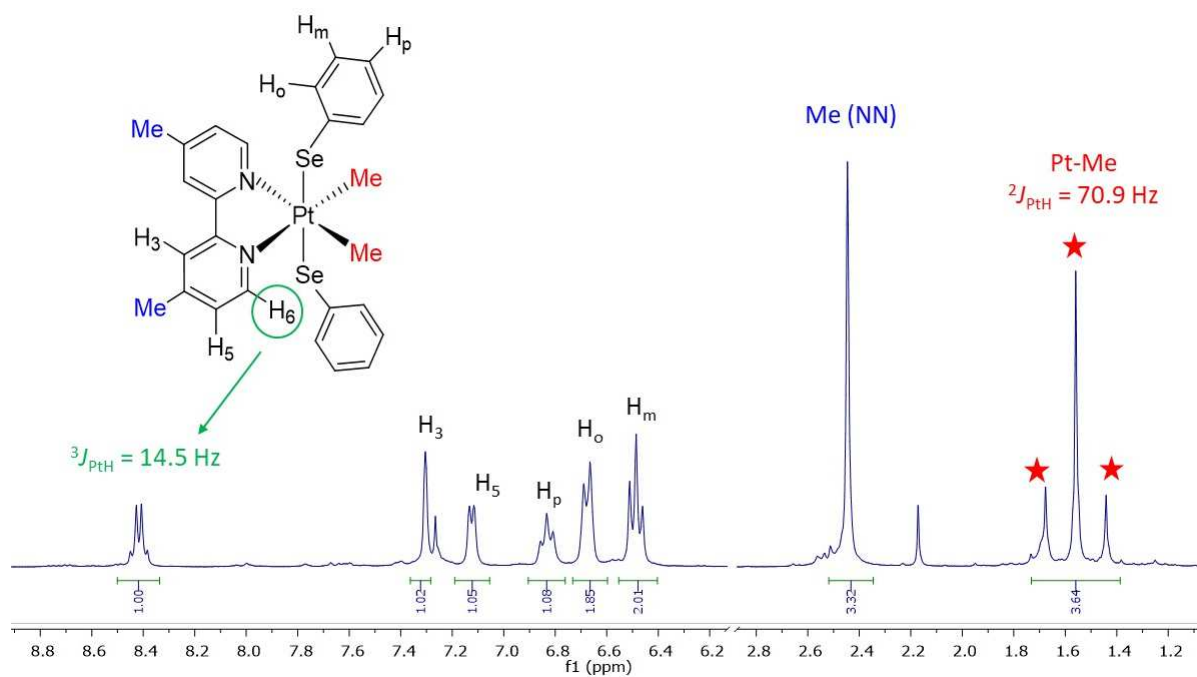

**Figure S3.**  $^1\text{H}$  NMR spectrum of **3b** in  $\text{CDCl}_3$ .

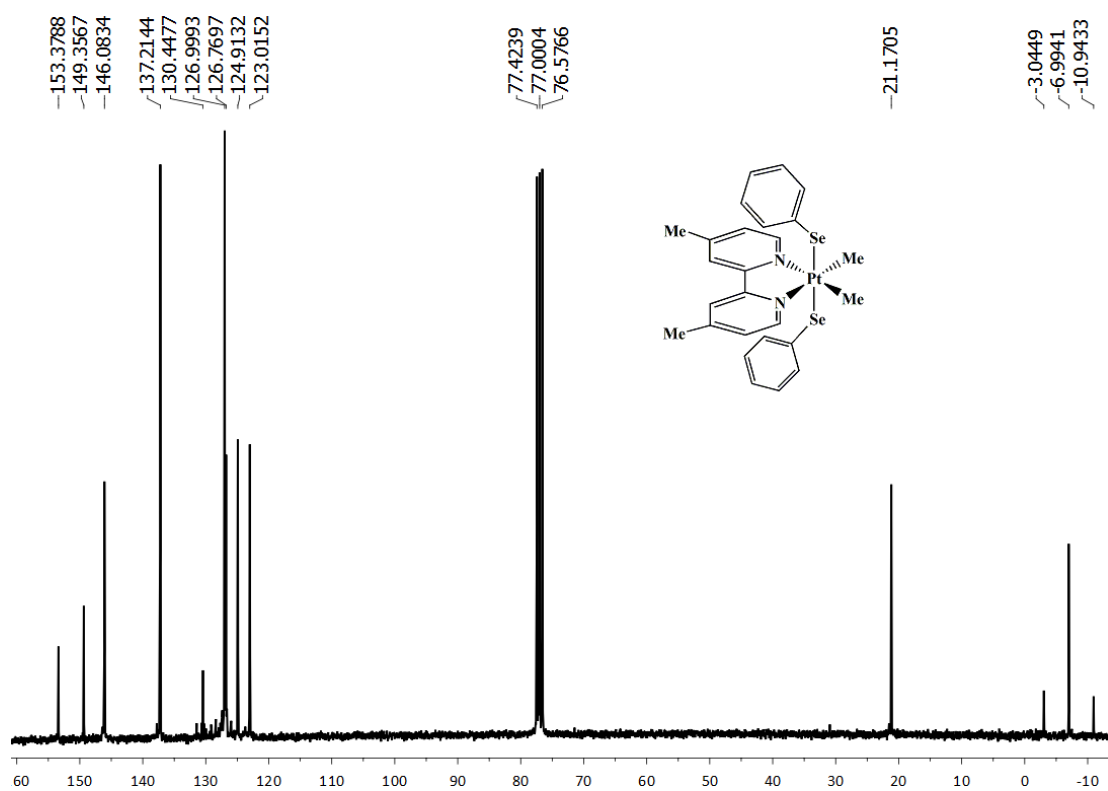

**Figure S4.**  $^{13}\text{C}\{^1\text{H}\}$  NMR spectrum of **3b** in  $\text{CDCl}_3$ .

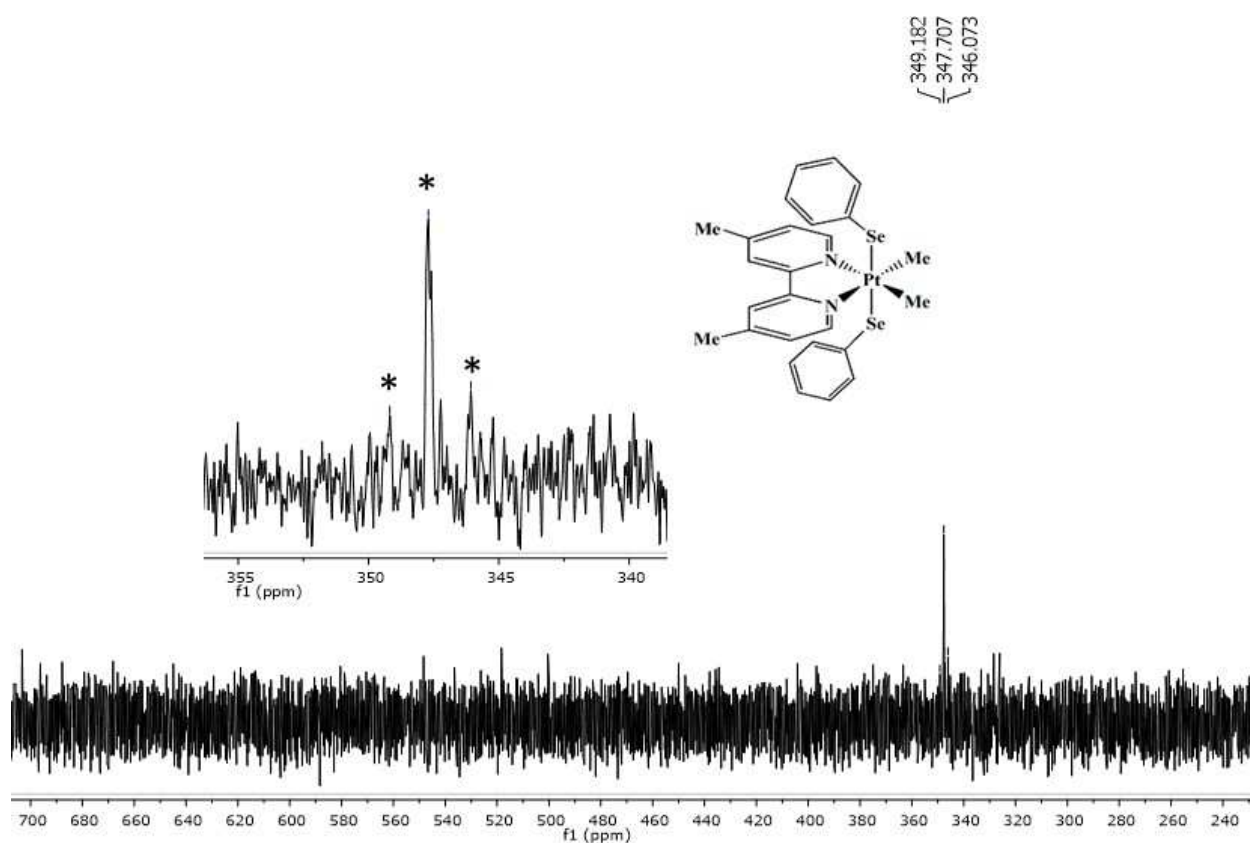

**Figure S5.**  $^{77}\text{Se}\{\text{H}\}$  NMR spectrum of **3b** in  $\text{CDCl}_3$ .

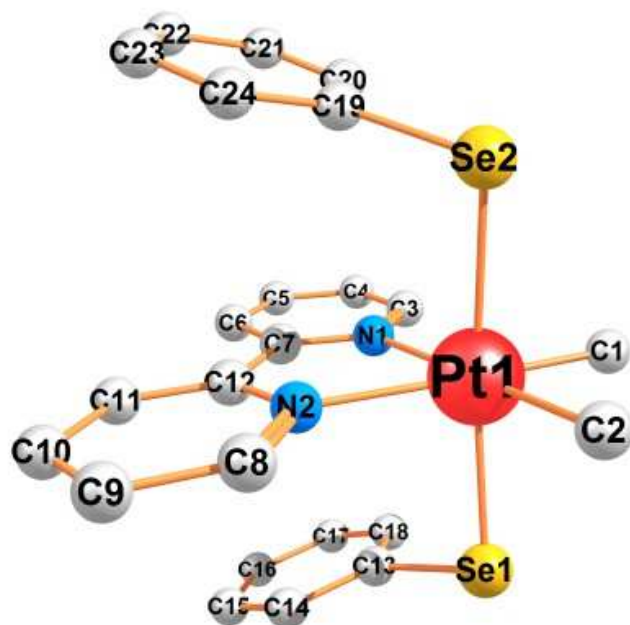

**Figure S6.** View of the DFT-optimised  $S_0$  structure of **1b** in the gas phase with atom numbering.

**Table S1.** Selected DFT-calculated metrics for the  $S_0$  state of **1b** in the gas phase and  $\text{CH}_2\text{Cl}_2$  <sup>a</sup> compared with experimental data from single crystal XRD.

| distances (Å) | $S_0$ (gas phase) | $S_0$ ( $\text{CH}_2\text{Cl}_2$ ) | experimental <sup>b</sup> |
|---------------|-------------------|------------------------------------|---------------------------|
| Pt1–Se1       | 2.629             | 2.629                              | 2.478(1)                  |
| Pt1–Se2       | 2.626             | 2.625                              | 2.498(1) <sup>c</sup>     |
| Pt1–N1        | 2.256             | 2.250                              | 2.162(5) <sup>c</sup>     |
| Pt1–N2        | 2.223             | 2.216                              | 2.162(5)                  |
| Pt1–C1        | 2.078             | 2.081                              | 2.055(8)                  |
| Pt1–C2        | 2.071             | 2.074                              | 2.055(8)                  |
| angles (°)    |                   |                                    |                           |
| N1–Pt1–N2     | 74.075            | 74.530                             | 76.4(2)                   |
| C2–Pt1–C1     | 85.740            | 85.577                             | 86.6(3)                   |
| N2–Pt1–C2     | 98.319            | 98.230                             | 98.5(3)                   |
| C1–Pt1–N1     | 101.921           | 101.696                            | 98.5(3)                   |
| C1–Pt1–N2     | 175.665           | 176.051                            | 174.9(3)                  |
| C2–Pt1–N1     | 172.119           | 172.556                            | 174.9(3)                  |
| Pt–Se1–C13    | 105.302           | 106.119                            | 103.4(4)                  |
| Pt–Se2–C19    | 104.993           | 105.891                            | 103.1(3)                  |
| Se1–Pt1–Se2   | 172.501           | 172.499                            | 173.24(4)                 |

<sup>a</sup> DFT-calculated geometries on B3LYP level of theory, LANL2DZ basis sets for Pt and Se, 6-31G(d) basis sets for C, H, and N. <sup>b</sup> From ref. 1. <sup>c</sup> Different values to disorder.

**Table S2.** Selected DFT-calculated metrics for the  $T_1$  state of the complexes **1b** and **2b** in the gas phase.

| <b>1b</b>     |                   | <b>2b</b>     |                   |
|---------------|-------------------|---------------|-------------------|
| distances (Å) | $T_1$ (gas phase) | distances (Å) | $T_1$ (gas phase) |
| Pt1–Se1       | 3.166             | Pt1–Se1       | 3.120             |
| Pt1–Se2       | 3.035             | Pt1–Se2       | 3.119             |
| Pt1–N1        | 2.241             | Pt1–N1        | 2.236             |
| Pt1–N2        | 2.214             | Pt1–N2        | 2.236             |
| Pt1–C1        | 2.058             | Pt1–C1        | 2.053             |
| Pt1–C2        | 2.053             | Pt1–C2        | 2.053             |
| angles (°)    |                   | angles (°)    |                   |
| N1–Pt1–N2     | 74.552            | N1–Pt1–N2     | 75.458            |
| C2–Pt1–C1     | 86.152            | C2–Pt1–C1     | 86.182            |
| N2–Pt1–C2     | 97.471            | N2–Pt1–C2     | 99.180            |
| C1–Pt1–N1     | 101.812           | C1–Pt1–N1     | 99.183            |
| C1–Pt1–N2     | 176.200           | C1–Pt1–N2     | 174.607           |
| C2–Pt1–N1     | 172.006           | C2–Pt1–N1     | 174.603           |
| Pt–Se1–C13    | 106.161           | Pt–Se1–C15    | 102.566           |
| Pt–Se2–C19    | 105.471           | Pt–Se2–C21    | 102.565           |
| Se1–Pt1–Se2   | 157.672           | Se1–Pt1–Se2   | 157.325           |

<sup>a</sup> DFT-calculated geometries on B3LYP level of theory, LANL2DZ basis sets for Pt and Se, 6-31G(d) basis sets for C, H, and N.



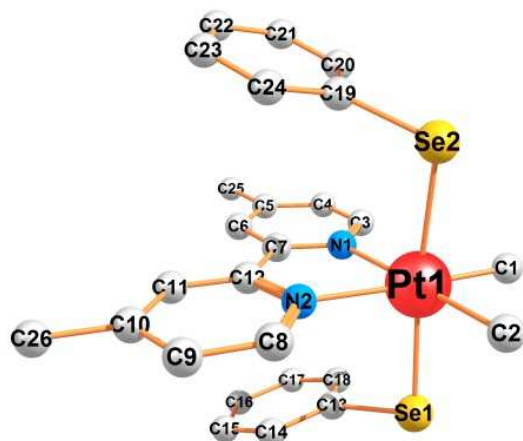

**Figure S8.** View of the DFT-optimised  $S_0$  structure of **3b** in the gas phase with atom numbering.

**Table S4.** Selected DFT-calculated metrics for the  $S_0$  state of **3b** in gas phase and  $\text{CH}_2\text{Cl}_2$ .<sup>a</sup>

| distances (Å) | $S_0$ (gas phase) | $S_0$ ( $\text{CH}_2\text{Cl}_2$ ) |
|---------------|-------------------|------------------------------------|
| Pt1–Se1       | 2.629             | 2.629                              |
| Pt1–Se2       | 2.627             | 2.626                              |
| Pt1–N1        | 2.252             | 2.247                              |
| Pt1–N2        | 2.221             | 2.213                              |
| Pt1–C1        | 2.078             | 2.080                              |
| Pt1–C2        | 2.071             | 2.074                              |
| angles (°)    |                   |                                    |
| N1–Pt1–N2     | 73.991            | 74.448                             |
| N2–Pt1–C2     | 98.417            | 98.164                             |
| C2–Pt1–C1     | 86.092            | 85.786                             |
| C1–Pt1–N1     | 101.550           | 101.629                            |
| C1–Pt1–N2     | 175.251           | 175.943                            |
| C2–Pt1–N1     | 172.173           | 172.430                            |
| Pt–Se1–C13    | 105.373           | 106.217                            |
| Pt–Se2–C19    | 105.083           | 105.836                            |
| Se1–Pt1–Se2   | 172.536           | 172.460                            |

<sup>a</sup> DFT-calculated geometries on B3LYP level of theory, LANL2DZ basis sets for Pt and Se, 6-31G(d) basis sets for C, H, and N.

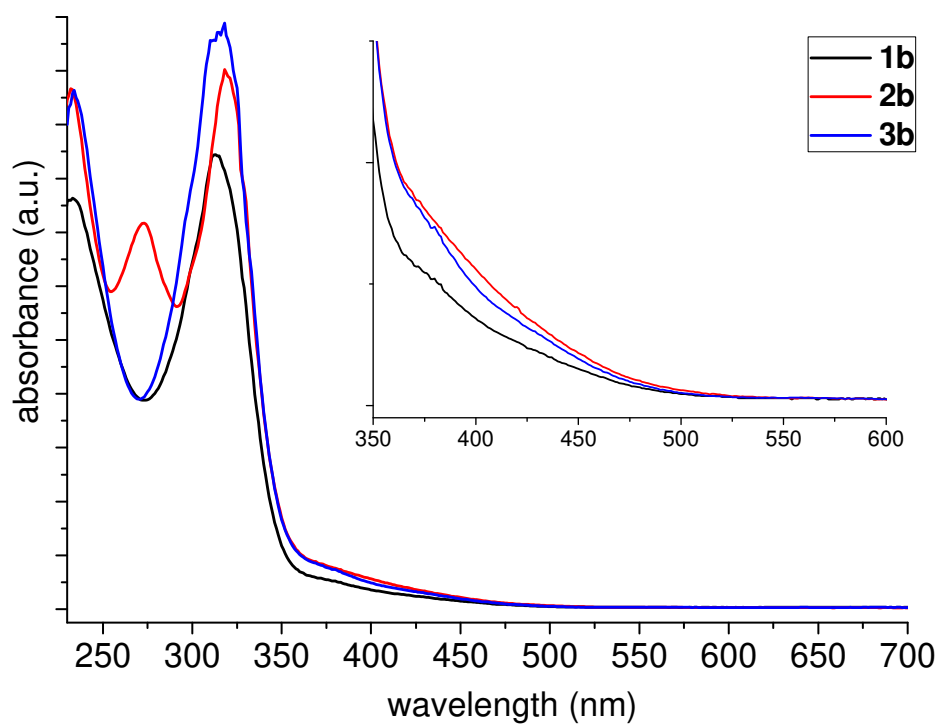

**Figure S9.** UV-vis absorption spectra of **1b** (black), **2b** (red) and **3b** (blue) (all  $10^{-5}$  M) in  $\text{CH}_2\text{Cl}_2$  at 298 K. Inset: Expanded spectra in the wavelength range 350–600 nm.

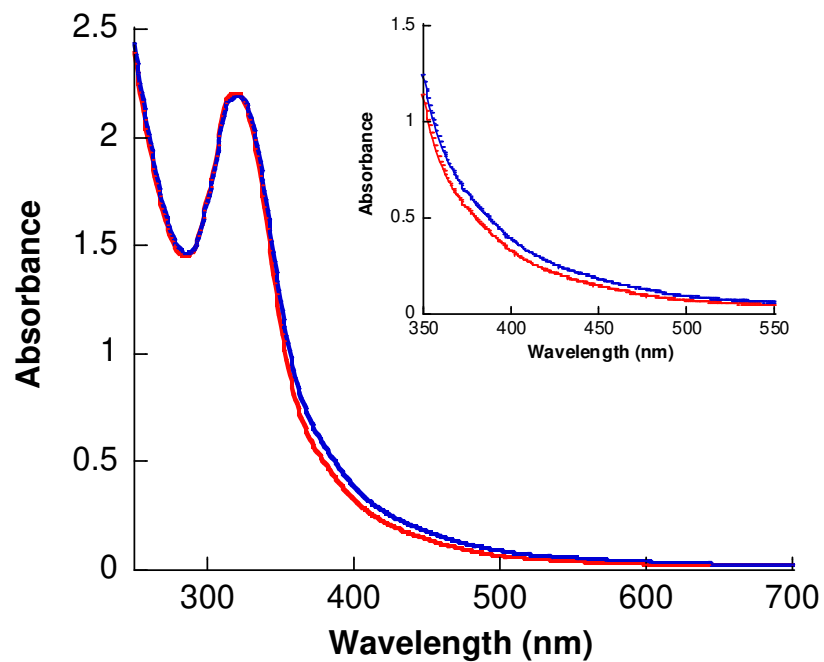

**Figure S10.** UV-vis absorption spectra of the complex **3b** in *tris*-HCl buffer at 298 K ( $1.1 \times 10^{-5}$  M); blue line,  $t = 0$ , red line,  $t = 30$  min (in the dark). Inset: Expanded spectra in the wavelength range 350–550 nm.



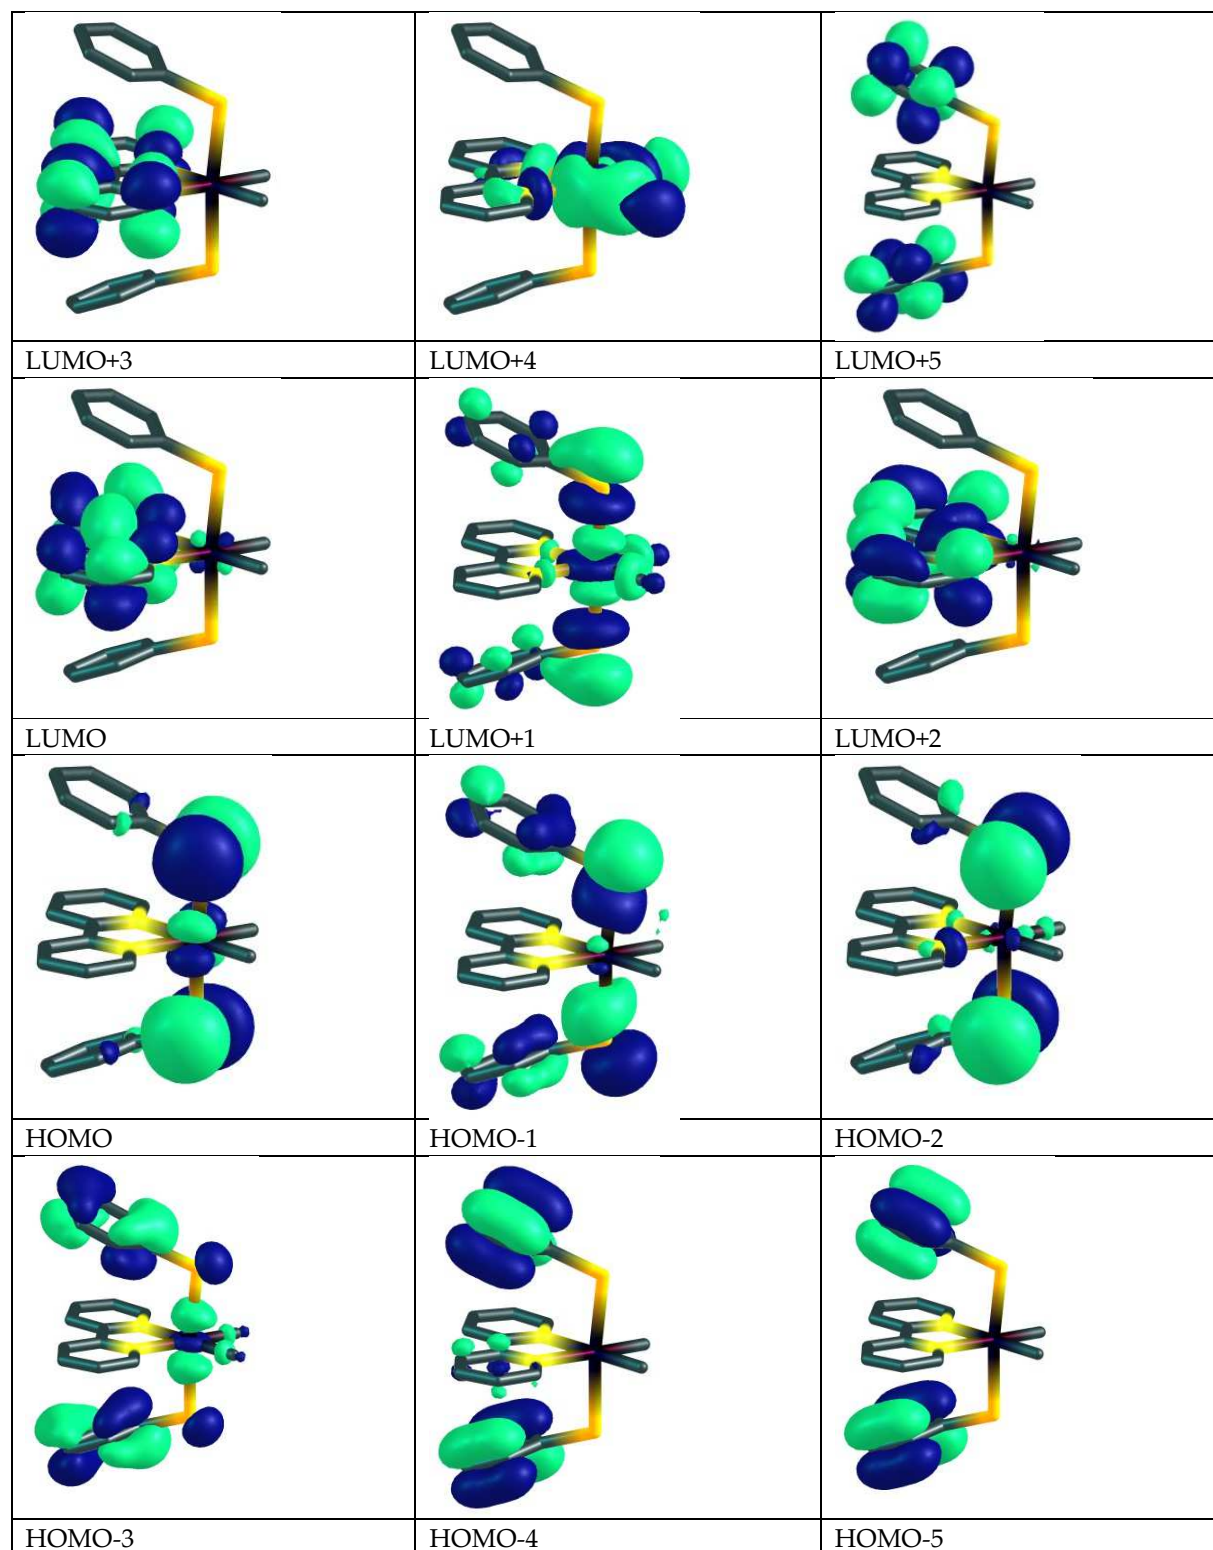

**Figure S11.** Molecular orbital plots for the DFT-optimised  $S_0$  structure of **1b** in  $\text{CH}_2\text{Cl}_2$  solution.

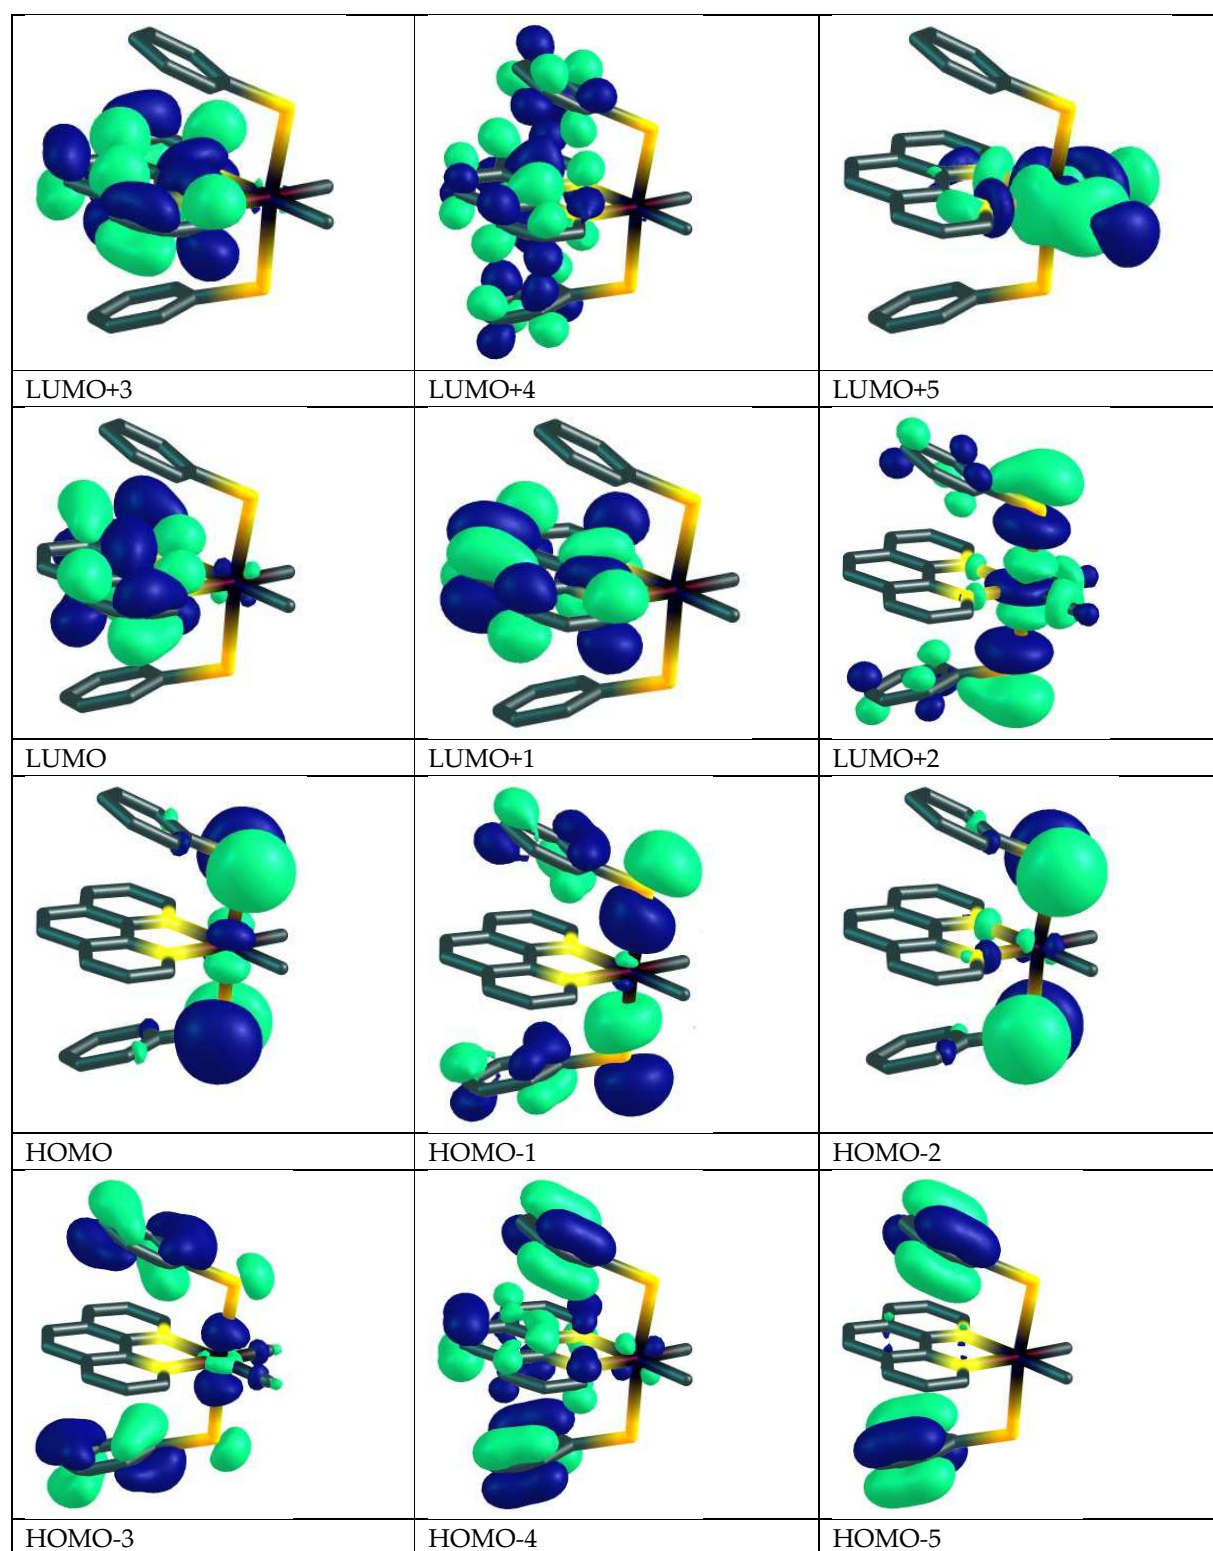

**Figure S12.** Molecular orbital plots for the DFT-optimised  $S_0$  structure of **2b** in  $\text{CH}_2\text{Cl}_2$  solution.

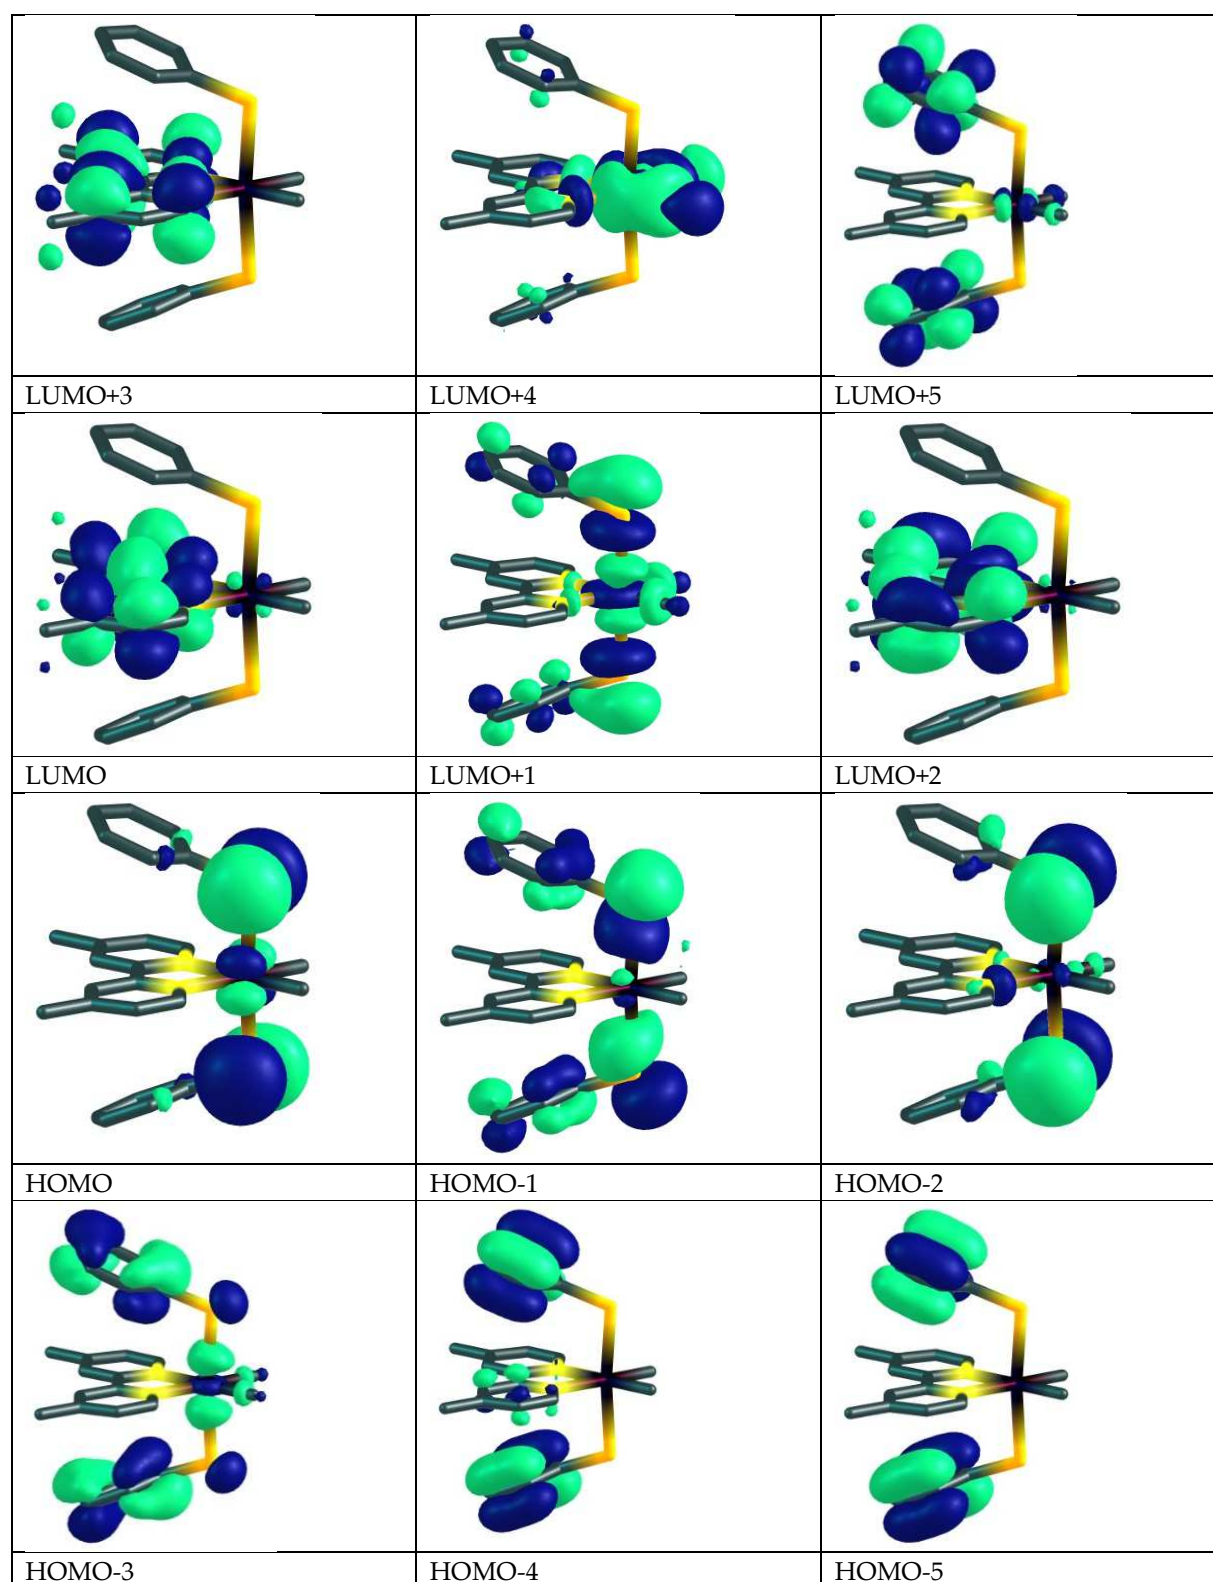

**Figure S13.** Molecular orbital plots for the DFT-optimised  $S_0$  structure of **3b** in  $\text{CH}_2\text{Cl}_2$  solution.

**Table S5.** Composition and energies of selected molecular orbitals of **1b** in CH<sub>2</sub>Cl<sub>2</sub>.

| MO     | energy<br>(eV) | components(%) |     |    |    |    |
|--------|----------------|---------------|-----|----|----|----|
|        |                | Pt            | bpy | Se | Ph | Me |
| LUMO+5 | -0.084         | 5             | 5   | 0  | 89 | 1  |
| LUMO+4 | -0.147         | 41            | 25  | 1  | 3  | 30 |
| LUMO+3 | -1.101         | 1             | 98  | 1  | 1  | 0  |
| LUMO+2 | -1.354         | 3             | 93  | 1  | 3  | 0  |
| LUMO+1 | -1.875         | 35            | 3   | 40 | 13 | 9  |
| LUMO   | -2.207         | 2             | 96  | 1  | 1  | 0  |
| HOMO   | -5.316         | 14            | 0   | 74 | 11 | 0  |
| HOMO-1 | -5.628         | 12            | 2   | 53 | 32 | 1  |
| HOMO-2 | -5.687         | 3             | 5   | 76 | 13 | 3  |
| HOMO-3 | -6.768         | 14            | 1   | 71 | 10 | 3  |
| HOMO-4 | -6.811         | 0             | 6   | 0  | 94 | 0  |
| HOMO-5 | -6.859         | 0             | 2   | 0  | 98 | 0  |

**Table S6.** Composition and energies of selected molecular orbitals of **2b** in CH<sub>2</sub>Cl<sub>2</sub>.

| MO     | energy<br>(eV) | components(%) |      |    |    |    |
|--------|----------------|---------------|------|----|----|----|
|        |                | Pt            | phen | Se | Ph | Me |
| LUMO+5 | -0.070         | 4             | 9    | 0  | 86 | 1  |
| LUMO+4 | -0.158         | 1             | 64   | 0  | 35 | 0  |
| LUMO+3 | -0.861         | 3             | 91   | 1  | 4  | 1  |
| LUMO+2 | -1.881         | 35            | 3    | 40 | 13 | 8  |
| LUMO+1 | -2.076         | 0             | 99   | 0  | 1  | 0  |
| LUMO   | -2.183         | 2             | 95   | 0  | 1  | 0  |
| HOMO   | -5.318         | 14            | 0    | 74 | 11 | 1  |
| HOMO-1 | -5.621         | 12            | 3    | 50 | 34 | 1  |
| HOMO-2 | -5.681         | 3             | 6    | 77 | 11 | 3  |
| HOMO-3 | -6.762         | 13            | 2    | 10 | 71 | 3  |
| HOMO-4 | -6.821         | 0             | 5    | 0  | 95 | 0  |
| HOMO-5 | -6.892         | 8             | 57   | 1  | 34 | 0  |

**Table S7.** Composition and energies of selected molecular orbitals of **3b** in CH<sub>2</sub>Cl<sub>2</sub>.

| MO     | energy<br>(eV) | components(%) |                     |    |    |    |
|--------|----------------|---------------|---------------------|----|----|----|
|        |                | Pt            | Me <sub>2</sub> bpy | Se | Ph | Me |
| LUMO+5 | -0.070         | 8             | 6                   | 0  | 82 | 4  |
| LUMO+4 | -0.091         | 39            | 25                  | 1  | 5  | 30 |
| LUMO+3 | -0.936         | 1             | 98                  | 0  | 1  | 0  |
| LUMO+2 | -1.196         | 2             | 92                  | 2  | 3  | 1  |
| LUMO+1 | -1.845         | 35            | 3                   | 40 | 13 | 9  |
| LUMO   | -2.121         | 1             | 96                  | 2  | 1  | 0  |
| HOMO   | -5.290         | 14            | 0                   | 74 | 11 | 1  |
| HOMO-1 | -5.601         | 12            | 2                   | 53 | 32 | 1  |
| HOMO-2 | -5.661         | 4             | 5                   | 75 | 13 | 3  |
| HOMO-3 | -6.748         | 14            | 1                   | 11 | 71 | 4  |
| HOMO-4 | -6.794         | 0             | 7                   | 0  | 93 | 0  |
| HOMO-5 | -6.845         | 1             | 2                   | 0  | 97 | 0  |

**Table S8.** Wavelengths and the nature of transitions for the complex **1b** <sup>a</sup>

| transition                      | oscillator strength | calcd. $\lambda$ (nm) | exp. $\lambda$ (nm) | major contribution | assignment                                   |
|---------------------------------|---------------------|-----------------------|---------------------|--------------------|----------------------------------------------|
| S <sub>0</sub> →S <sub>1</sub>  | 0.0005              | 507.17                | 475                 | HOMO→LUMO (99%)    | L'LCT/MLCT                                   |
| S <sub>0</sub> →S <sub>2</sub>  | 0.0001              | 500.07                |                     | HOMO→L+1 (98%)     | IL'CT/L'MCT                                  |
| S <sub>0</sub> →S <sub>3</sub>  | 0.0045              | 443.30                | 422                 | H-1→LUMO (79%)     | L'LCT/MLCT                                   |
| S <sub>0</sub> →S <sub>4</sub>  | 0.0031              | 438.84                |                     | H-2→LUMO (79%)     | L'LCT                                        |
| S <sub>0</sub> →S <sub>5</sub>  | 0.0015              | 425.16                | 372                 | H-2→L+1 (89%)      | IL'CT(n→ $\pi^*$ )/L'MCT                     |
| S <sub>0</sub> →S <sub>6</sub>  | 0.0014              | 371.93                |                     | HOMO→L+2 (100%)    | L'LCT/MLCT                                   |
| S <sub>0</sub> →S <sub>7</sub>  | 0.9801              | 354.57                | 313                 | H-1→L+1 (86%)      | IL'CT(n→ $\pi^*$ and $\pi$ → $\pi^*$ )/L'MCT |
| S <sub>0</sub> →S <sub>16</sub> | 0.1042              | 296.73                |                     | HOMO→L+4 (76%)     | L'MCT                                        |
| S <sub>0</sub> →S <sub>22</sub> | 0.1422              | 282.40                |                     | H-6→LUMO (50%),    | ILCT                                         |
|                                 |                     |                       |                     | H-5→L+1 (17%)      | IL'CT(n→ $\pi^*$ )/L'MCT                     |
| S <sub>0</sub> →S <sub>43</sub> | 0.0869              | 248.32                | 233                 | H-7→L+1 (39%)      | IL'CT(n→ $\pi^*$ )/L'MCT                     |
|                                 |                     |                       |                     | H-1→L+9 (16%)      | IL'CT(n→ $\pi^*$ )/L'LCT                     |
|                                 |                     |                       |                     | H-9→L+1 (15%)      | IL'CT(n→ $\pi^*$ )/LL'CT                     |

<sup>a</sup> M = Pt, L = bpy, L' = SePh and L'' = Me. The experimental values *in italics* were not precisely determined (weak shoulders).

**Table S9.** Wavelengths and the nature of transitions for the complex **2b** <sup>a</sup>

| Transition                      | oscillator strength | calcd. $\lambda$ (nm) | exp. $\lambda$ (nm) | major contribution | assignment               |
|---------------------------------|---------------------|-----------------------|---------------------|--------------------|--------------------------|
| S <sub>0</sub> →S <sub>1</sub>  | 0.0000              | 500.49                | 483                 | HOMO→L+2 (85%)     | IL'CT(n→ $\pi^*$ )/L'MCT |
| S <sub>0</sub> →S <sub>2</sub>  | 0.0000              | 500.47                |                     | HOMO→LUMO (85%)    | L'LCT/MLCT               |
| S <sub>0</sub> →S <sub>3</sub>  | 0.0006              | 467.29                |                     | HOMO→L+1 (99%)     | L'LCT/MLCT               |
| S <sub>0</sub> →S <sub>4</sub>  | 0.0088              | 438.87                | 372                 | H-1→LUMO (95%)     | L'LCT/MLCT               |
| S <sub>0</sub> →S <sub>5</sub>  | 0.0010              | 435.67                |                     | H-2→LUMO (95%)     | L'LCT/MLCT               |
| S <sub>0</sub> →S <sub>6</sub>  | 0.0002              | 426.67                |                     | H-2→L+2 (97%)      | IL'CT(n→ $\pi^*$ )/L'MCT |
| S <sub>0</sub> →S <sub>7</sub>  | 0.0058              | 418.46                |                     | H-1→L+1 (99%)      | L'MCT                    |
| S <sub>0</sub> →S <sub>8</sub>  | 0.0006              | 411.80                |                     | H-2→L+1 (100%)     | IL'CT(n→ $\pi^*$ )/L'MCT |
| S <sub>0</sub> →S <sub>9</sub>  | 0.9711              | 356.50                | 319                 | H-1→L+2 (95%)      | L'MCT                    |
| S <sub>0</sub> →S <sub>22</sub> | 0.0561              | 293.19                | 272                 | HOMO→L+5 (65%)     | IL'CT(n→ $\pi^*$ )       |
| S <sub>0</sub> →S <sub>36</sub> | 0.1357              | 267.82                | 232                 | H-7→LUMO (31%)     | ILCT/MLCT                |
|                                 |                     |                       |                     | H-8→L+1 (26%)      | L'LCT/MLCT               |

<sup>a</sup> M = Pt, L = phen, L' = SePh and L'' = Me. The experimental values *in italics* were not precisely determined (weak shoulders).

**Table S10.** Wavelengths and the nature of transitions for the complex **3b** <sup>a</sup>

| transition                     | oscillator strength | calcd. $\lambda$ (nm) | exp. $\lambda$ (nm) | major contribution | assignment               |
|--------------------------------|---------------------|-----------------------|---------------------|--------------------|--------------------------|
| S <sub>0</sub> →S <sub>1</sub> | 0.0001              | 499.00                | 478                 | HOMO→L+1 (98%)     | IL'CT(n→ $\pi^*$ )/L'MCT |
| S <sub>0</sub> →S <sub>2</sub> | 0.0005              | 493.58                | 424                 | HOMO→LUMO (99%)    | L'LCT/MLCT               |
| S <sub>0</sub> →S <sub>3</sub> | 0.0062              | 433.69                |                     | H-1→LUMO (85%)     | L'LCT/MLCT               |
| S <sub>0</sub> →S <sub>4</sub> | 0.0038              | 428.93                | 379                 | H-2→LUMO (84%)     | L'LCT/MLCT               |
| S <sub>0</sub> →S <sub>5</sub> | 0.0018              | 424.61                | 371                 | H-2→L+1 (87%)      | IL'CT(n→ $\pi^*$ )/L'MCT |
| S <sub>0</sub> →S <sub>6</sub> | 0.0090              | 357.71                |                     | HOMO→L+2 (99%)     | L'LCT/MLCT               |

|                          |        |        |     |                              |                                                                   |
|--------------------------|--------|--------|-----|------------------------------|-------------------------------------------------------------------|
| $S_0 \rightarrow S_7$    | 0.9817 | 353.81 | 314 | H-1 $\rightarrow$ L+1 (83%)  | IL'CT(n $\rightarrow$ $\pi^*$ and $\pi \rightarrow \pi^*$ )/L'MCT |
| $S_0 \rightarrow S_{16}$ | 0.0981 | 296.05 |     | HOMO $\rightarrow$ L+4 (49%) | L'LCT/L'MCT                                                       |
| $S_0 \rightarrow S_{21}$ | 0.0211 | 283.48 |     | H-3 $\rightarrow$ L+1 (57%)  | IL'CT(n $\rightarrow$ $\pi^*$ and $\pi \rightarrow \pi^*$ )/L'MCT |
|                          |        |        |     | H-4 $\rightarrow$ L+1 (12%)  | IL'CT(n $\rightarrow$ $\pi^*$ and $\pi \rightarrow \pi^*$ )/L'MCT |
| $S_0 \rightarrow S_{43}$ | 0.0439 | 248.09 | 234 | H-12 $\rightarrow$ L+1 (74%) | ML'CT/IL'CT(n $\rightarrow$ $\pi^*$ )                             |

<sup>a</sup> M = Pt, L = Me<sub>2</sub>bpy, L' = SePh and L'' = Me. The experimental values *in italics* were not precisely determined (weak shoulders).

## References

- (1) A. J. Canty, H. Jin, B. W. Skelton, A. H. White, Oxidation of Complexes by (O<sub>2</sub>CPh)<sub>2</sub> and (ER)<sub>2</sub> (E = S, Se), Including Structures of Pd(CH<sub>2</sub>CH<sub>2</sub>CH<sub>2</sub>CH<sub>2</sub>)(SePh)<sub>2</sub>(bpy) (bpy = 2,2'-Bipyridine) and MMe<sub>2</sub>(SePh)<sub>2</sub>(L<sub>2</sub>) (M = Pd, Pt; L<sub>2</sub> = bpy, 1,10-Phenanthroline) and C–O and C–E Bond Formation at Palladium(IV), *Inorg. Chem.* **1998**, 37, 3975–3981.
- (2) K.-T. Aye, J. J. Vittal, R. J. Puddephatt, Oxidative addition of E–E bonds (E = Group 16 element) to platinum(II): a route to platinum(IV) thiolate and selenolate complexes, *J. Chem. Soc., Dalton Trans.* **1993**, 1993, 1835–1839.
